# Supplementary material for: Iodine-catalyzed C–H/S–H oxidative coupling: from 1,3-diketones and thiophenols to β-dicarbonyl thioethers
Source: Royal Society of Chemistry journal article supplement (doi:10.1039/c5ra04906g), 2015-01-01

## Supplementary Information

### Iodine-Catalyzed C-H/S-H Oxidative Coupling: from 1,3-Diketones and Thiophenols to $\beta$ -Dicarbonyl Thioethers

Hao Cao,<sup>a,b</sup> Jiwen Yuan,<sup>b</sup> Chao Liu,<sup>b</sup> Xinquan Hu,<sup>a\*</sup> and Aiwen Lei<sup>b,c\*</sup>

<sup>a</sup> College of Chemical Engineering and Materials Science, Zhejiang University of Technology, Hangzhou 310014, China

<sup>b</sup> College of Chemistry and Molecular Sciences, Wuhan University, Wuhan 430072, P. R. China

<sup>c</sup> National Research Center for Carbohydrate Synthesis, Jiangxi Normal University, Nanchang 330022, Jiangxi, P. R. China

E-mail: [xinquan@zjut.edu.cn](mailto:xinquan@zjut.edu.cn); [aiwenlei@whu.edu.cn](mailto:aiwenlei@whu.edu.cn)

|                                                                                |    |
|--------------------------------------------------------------------------------|----|
| General Information.....                                                       | S2 |
| General Procedure.....                                                         | S3 |
| Detailed Descriptions for Products.....                                        | S4 |
| Copies of Product <sup>1</sup> H, <sup>13</sup> C and <sup>19</sup> F NMR..... | S8 |

## General Information

All reactions were isolated from oxygen by a nitrogen atmosphere in a sealed Schlenk tube. All glassware was fully dried at 110 °C in oven for hours and cooled down under vacuum. Diketones, iodine, ethyl acetate and DTBP (Di-*tert*-butyl peroxide, Chemical Purity) were all purchased from Sinopharm Chemical Reagent Co., Ltd. All thiophenols were purchased from Tianjin Heowns Biochem. Co., Ltd. Unless otherwise noted, other materials were obtained from commercial suppliers and used without further purification. Thin layer chromatography (TLC) employed glass 0.25 mm silica gel plates. Chromatography columns were packed with 200-300 mesh silica gel in petroleum ether (bp. 60-90 °C). Gas chromatographic analyses were performed on Varian GC 2000 gas chromatography instrument with a FID detector. GC-MS spectra were recorded on a Varian GC-MS 3900-2100T. <sup>1</sup>H, <sup>13</sup>C and <sup>19</sup>F NMR data were recorded with Bruker ADVANCE III (400 MHz) spectrometers with tetramethylsilane as an internal standard. High resolution mass spectra (HRMS) were measured with a Waters Micromass GCT instrument with ionisation mode of EI<sup>+</sup>, accurate masses are reported for the molecular ion ([M]<sup>+</sup>). All chemical shifts (δ) are reported in ppm and coupling constants (*J*) in Hz. All chemical shifts are reported relative to tetramethylsilane (0 ppm) and *d*-solvent peaks (77.3 ppm, chloroform), respectively.

## General Procedure

A sealed Schlenk tube was first dried under vacuum and then filled with N<sub>2</sub>. Under the protection of N<sub>2</sub>, diketone (0.45 mmol), thiophenol (0.3 mmol), *t*-BuOO*t*-Bu (131.4 mg, 0.9 mmol) and ethyl acetate (2 mL) were then injected into the tube by syringes (or by spoon if thiophenol is solid). After stirring for several minutes, iodine (7.6 mg, 0.03 mmol) was added into the reaction tube. The reaction was then heated up to 120 °C (**Warning:** boiling point of ethyl acetate is only 80 °C. So this reaction is of potential danger, please do this reaction in highly qualified sealed Schlenk tube and put the heater in fume hood!) and kept stirring for 6 hours. After completion of the reaction, the mixture was cooled to R.T. and then quenched sodium sulfite solution. The solution was extracted with ethyl acetate (3 × 5 mL). The organic layers were combined and dried over sodium sulfate. The pure product was obtained by flash column chromatography on silica gel (with petroleum ether : dichloromethane = 3 : 1).

Control experiments from 1a to 4a

As 4a intermediate is not stable at 120 °C, we have done the stoichiometric experiment from 1a to 4a at room temperature (we used H<sub>2</sub>O<sub>2</sub> instead of DTBP because DTBP decompose too slowly at r.t.). Finally, the 4a could be obtained in 93% yield, which matched well with our mechanism.

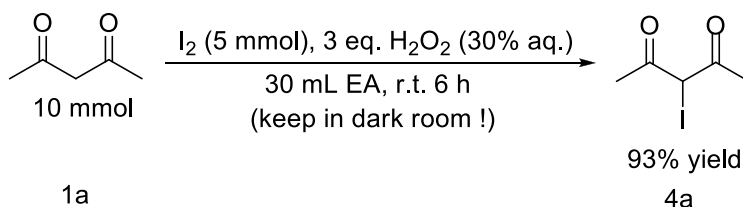

## Detailed Descriptions for Products

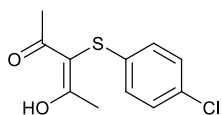

**3-(4-chlorophenylthio)-4-hydroxypent-3-en-2-one (3a):** Isolated yield = 85%. White solid. Melting point = 63 °C,  $^1\text{H}$  NMR (400 MHz,  $\text{CDCl}_3$ )  $\delta$  17.29 (s, 1H), 7.25 (d,  $J = 8.4$  Hz, 2H), 7.02 (d,  $J = 8.4$  Hz, 2H), 2.33 (s, 6H).  $^{13}\text{C}$  NMR (101 MHz,  $\text{CDCl}_3$ )  $\delta$  198.5, 136.6, 131.3, 129.5, 126.1, 101.5, 24.6. HRMS ( $\text{EI}^+$ ) calcd for  $\text{C}_{11}\text{H}_{11}\text{ClO}_2\text{S}$  [ $\text{M}$ ] $^+$ : 242.0168; found: 242.0173.

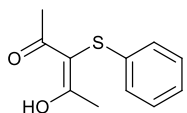

**4-hydroxy-3-(phenylthio)pent-3-en-2-one (3b):** Isolated yield = 88%. Colorless oil.  $^1\text{H}$  NMR (400 MHz,  $\text{CDCl}_3$ )  $\delta$  17.28 (s, 1H), 7.28 (m, 2H), 7.14 (m, 1H), 7.10 (m, 2H), 2.34 (s, 6H).  $^{13}\text{C}$  NMR (101 MHz,  $\text{CDCl}_3$ )  $\delta$  198.6, 138.0, 129.5, 125.5, 124.9, 101.8, 24.7. HRMS ( $\text{EI}^+$ ) calcd for  $\text{C}_{11}\text{H}_{12}\text{O}_2\text{S}$  [ $\text{M}$ ] $^+$ : 208.0558; found: 208.0562.

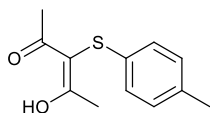

**4-hydroxy-3-(p-tolylthio)pent-3-en-2-one (3c):** Isolated yield = 51%. White solid. Melting point = 21 °C,  $^1\text{H}$  NMR (400 MHz,  $\text{CDCl}_3$ )  $\delta$  17.24 (s, 1H), 7.09 (d,  $J = 8.0$  Hz, 2H), 6.99 (d,  $J = 8.2$  Hz, 2H), 2.34 (s, 6H), 2.30 (s, 3H).  $^{13}\text{C}$  NMR (101 MHz,  $\text{CDCl}_3$ )  $\delta$  198.5, 135.3, 134.4, 130.2, 125.1, 102.3, 24.7, 21.1. HRMS ( $\text{EI}^+$ ) calcd for  $\text{C}_{12}\text{H}_{14}\text{O}_2\text{S}$  [ $\text{M}$ ] $^+$ : 222.0715; found: 222.0713.

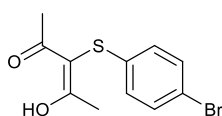

**3-(4-bromophenylthio)-4-hydroxypent-3-en-2-one (3d):** Isolated yield = 83%. White solid. Melting

point = 87 °C,  $^1\text{H}$  NMR (400 MHz,  $\text{CDCl}_3$ )  $\delta$  17.30 (s, 1H), 7.39 (d,  $J$  = 8.2 Hz, 2H), 6.96 (d,  $J$  = 8.2 Hz, 2H), 2.32 (s, 6H).  $^{13}\text{C}$  NMR (101 MHz,  $\text{CDCl}_3$ )  $\delta$  198.5, 137.3, 132.4, 126.4, 119.0, 101.3, 24.6. HRMS ( $\text{EI}^+$ ) calcd for  $\text{C}_{11}\text{H}_{11}\text{BrO}_2\text{S}$  [ $\text{M}$ ] $^+$ : 285.9663; found: 285.9666.

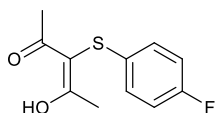

**3-(4-fluorophenylthio)-4-hydroxypent-3-en-2-one (3e):** Isolated yield = 55%. Colorless oil.  $^1\text{H}$  NMR (400 MHz,  $\text{CDCl}_3$ )  $\delta$  17.27 (s, 1H), 7.05 (d,  $J$  = 8.3 Hz, 2H), 7.01 (d,  $J$  = 8.2 Hz, 2H), 2.34 (s, 6H).  $^{13}\text{C}$  NMR (101 MHz,  $\text{CDCl}_3$ )  $\delta$  198.4, 161.3 (d,  $J$  = 164.6 Hz), 133.0 (d,  $J$  = 3.0 Hz), 126.7 (d,  $J$  = 8.1 Hz), 116.6 (d,  $J$  = 22.2 Hz), 102.4, 24.6.  $^{19}\text{F}$  NMR (377 MHz,  $\text{CDCl}_3$ )  $\delta$  -117.5. HRMS ( $\text{EI}^+$ ) calcd for  $\text{C}_{11}\text{H}_{11}\text{FO}_2\text{S}$  [ $\text{M}$ ] $^+$ : 226.0464; found: 226.0468.

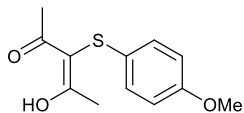

**4-hydroxy-3-(4-methoxyphenylthio)pent-3-en-2-one (3f):** Isolated yield = 70%. White solid. Melting point = 78 °C,  $^1\text{H}$  NMR (400 MHz,  $\text{CDCl}_3$ )  $\delta$  17.20 (s, 1H), 7.04 (d,  $J$  = 8.8 Hz, 2H), 6.84 (d,  $J$  = 8.8 Hz, 2H), 3.78 (s, 3H), 2.36 (s, 6H).  $^{13}\text{C}$  NMR (101 MHz,  $\text{CDCl}_3$ )  $\delta$  198.3, 158.2, 128.7, 127.2, 115.2, 103.4, 55.7, 24.8. HRMS ( $\text{EI}^+$ ) calcd for  $\text{C}_{12}\text{H}_{14}\text{O}_3\text{S}$  [ $\text{M}$ ] $^+$ : 238.0664; found: 238.0663.

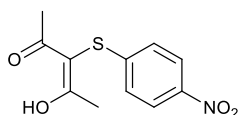

**4-hydroxy-3-(4-nitrophenylthio)pent-3-en-2-one (3g):** Isolated yield = 72%. White solid. Melting point = 119 °C,  $^1\text{H}$  NMR (400 MHz,  $\text{CDCl}_3$ )  $\delta$  17.40 (s, 1H), 8.15 (d,  $J$  = 8.8 Hz, 2H), 7.22 (d,  $J$  = 9.1 Hz, 2H), 2.33 (s, 6H).  $^{13}\text{C}$  NMR (101 MHz,  $\text{CDCl}_3$ )  $\delta$  198.6, 147.7, 145.6, 124.6, 124.4, 99.9, 24.4. HRMS ( $\text{EI}^+$ )

calcd for C<sub>11</sub>H<sub>11</sub>NO<sub>4</sub>S [M]<sup>+</sup>: 253.0409; found: 253.0416.

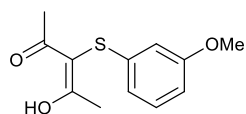

**4-hydroxy-3-(3-methoxyphenylthio)pent-3-en-2-one (3h):** Isolated yield = 62%. Colorless oil. <sup>1</sup>H NMR (400 MHz, CDCl<sub>3</sub>) δ 17.30 (s, 1H), 7.20 (t, *J* = 8.0 Hz, 1H), 6.68 (m, 1H), 6.66 (m, 1H), 6.63 (m, 1H), 3.79 (s, 3H), 2.34 (s, 6H). <sup>13</sup>C NMR (101 MHz, CDCl<sub>3</sub>) δ 198.6, 160.5, 139.5, 130.4, 117.1, 110.7, 101.6, 55.5, 24.7. HRMS (EI<sup>+</sup>) calcd for C<sub>12</sub>H<sub>14</sub>O<sub>3</sub>S [M]<sup>+</sup>: 238.0664; found: 238.0666.

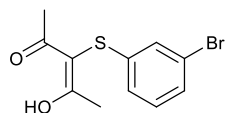

**4-hydroxy-3-(3-bromophenylthio)pent-3-en-2-one (3i):** Isolated yield = 55%. Colorless oil. <sup>1</sup>H NMR (400 MHz, CDCl<sub>3</sub>) δ 17.34 (s, 1H), 7.26 (m, 1H), 7.20 (m, 1H), 7.14 (t, *J* = 7.9 Hz, 1H), 7.01 (m, 1H), 2.34 (s, 6H). <sup>13</sup>C NMR (101 MHz, CDCl<sub>3</sub>) δ 198.7, 140.5, 130.8, 128.6, 127.3, 123.7, 123.3, 101.0, 24.7. HRMS (EI<sup>+</sup>) calcd for C<sub>11</sub>H<sub>11</sub>BrO<sub>2</sub>S[M]<sup>+</sup>: 285.9663; found: 285.9668.

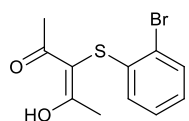

**3-(2-bromophenylthio)-4-hydroxypent-3-en-2-one (3j):** Isolated yield = 57%. Colorless oil. <sup>1</sup>H NMR (400 MHz, CDCl<sub>3</sub>) δ 17.40 (s, 1H), 7.53 (dd, *J*<sub>1</sub> = 7.8 Hz, *J*<sub>2</sub> = 1.3 Hz, 1H), 7.24 (td, *J*<sub>1</sub> = 7.8 Hz, *J*<sub>2</sub> = 1.2 Hz, 1H), 7.01 (td, *J*<sub>1</sub> = 7.8 Hz, *J*<sub>2</sub> = 1.2 Hz, 1H), 6.84 (dd, *J*<sub>1</sub> = 8.0 Hz, *J*<sub>2</sub> = 1.3 Hz, 1H), 2.31 (s, 6H). <sup>13</sup>C NMR (101 MHz, CDCl<sub>3</sub>) δ 198.8, 138.8, 133.5, 128.3, 126.5, 124.6, 120.4, 101.2, 24.5. HRMS (EI<sup>+</sup>) calcd for C<sub>11</sub>H<sub>11</sub>BrO<sub>2</sub>S[M]<sup>+</sup>: 285.9663; found: 285.9659.

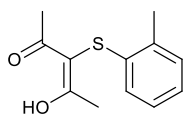

**4-hydroxy-3-(o-tolylthio)pent-3-en-2-one (3k):** Isolated yield = 45%. Colorless oil.  $^1\text{H}$  NMR (400 MHz,  $\text{CDCl}_3$ )  $\delta$  17.34 (s, 1H), 7.15 (d,  $J = 7.6$  Hz, 1H), 7.13 (t,  $J = 8.0$  Hz, 1H), 7.05 (t,  $J = 7.6$  Hz, 1H), 6.83 (d,  $J = 8.0$  Hz, 1H), 2.38 (s, 3H), 2.31 (s, 6H).  $^{13}\text{C}$  NMR (101 MHz,  $\text{CDCl}_3$ )  $\delta$  198.6, 136.8, 134.6, 130.6, 127.0, 125.0, 122.9, 101.0, 24.6, 19.9. HRMS ( $\text{EI}^+$ ) calcd for  $\text{C}_{12}\text{H}_{14}\text{O}_2\text{S}$   $[\text{M}]^+$ : 222.0715; found: 222.0719.

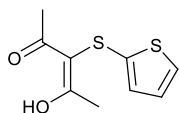

**4-hydroxy-3-(thiophen-2-ylthio)pent-3-en-2-one (3l):** Isolated yield = 28%. Colorless oil.  $^1\text{H}$  NMR (400 MHz,  $\text{CDCl}_3$ )  $\delta$  17.10 (s, 1H), 7.23 (d,  $J = 4.2$  Hz, 1H), 7.97 (d,  $J = 3.6$  Hz, 1H), 6.93 (t,  $J = 4.4$  Hz, 1H), 2.48 (s, 6H).  $^{13}\text{C}$  NMR (101 MHz,  $\text{CDCl}_3$ )  $\delta$  197.8, 138.1, 128.4, 127.8, 127.1, 106.3, 24.9. HRMS ( $\text{EI}^+$ ) calcd for  $\text{C}_9\text{H}_{10}\text{O}_2\text{S}_2$   $[\text{M}]^+$ : 214.0122; found: 214.0123.

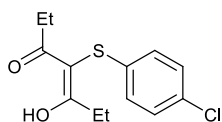

**4-(4-chlorophenylthio)-5-hydroxyhept-4-en-3-one (3m):** Isolated yield = 57%. White solid. Melting point = 16  $^\circ\text{C}$ ,  $^1\text{H}$  NMR (400 MHz,  $\text{CDCl}_3$ )  $\delta$  17.47 (s, 1H), 7.24 (d,  $J = 8.8$  Hz, 2H), 7.00 (d,  $J = 8.8$  Hz, 2H), 2.70 (s, 4H), 1.10 (t,  $J = 7.8$  Hz, 6H).  $^{13}\text{C}$  NMR (101 MHz,  $\text{CDCl}_3$ )  $\delta$  210.6, 137.1, 131.2, 129.5, 126.0, 100.0, 30.2, 9.8. HRMS ( $\text{EI}^+$ ) calcd for  $\text{C}_{13}\text{H}_{15}\text{ClO}_2\text{S}$   $[\text{M}]^+$ : 270.0481; found: 270.0478.

# Copies of product $^1\text{H}$ , $^{13}\text{C}$ and $^{19}\text{F}$ NMR

3a

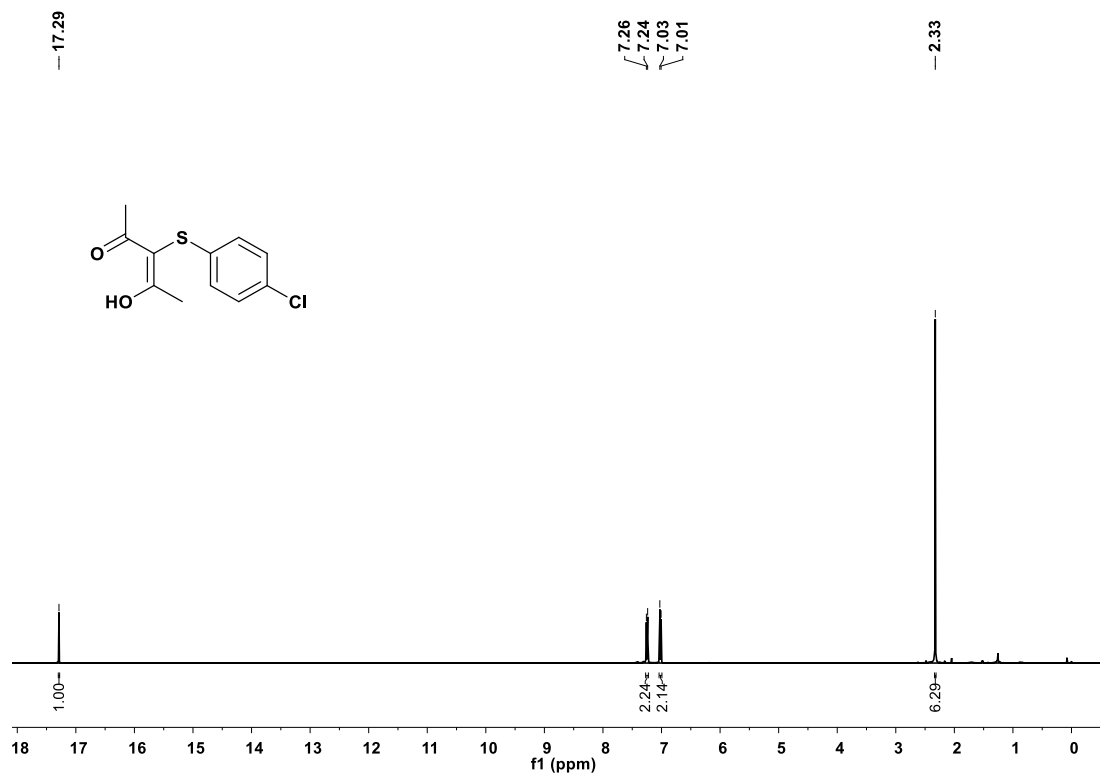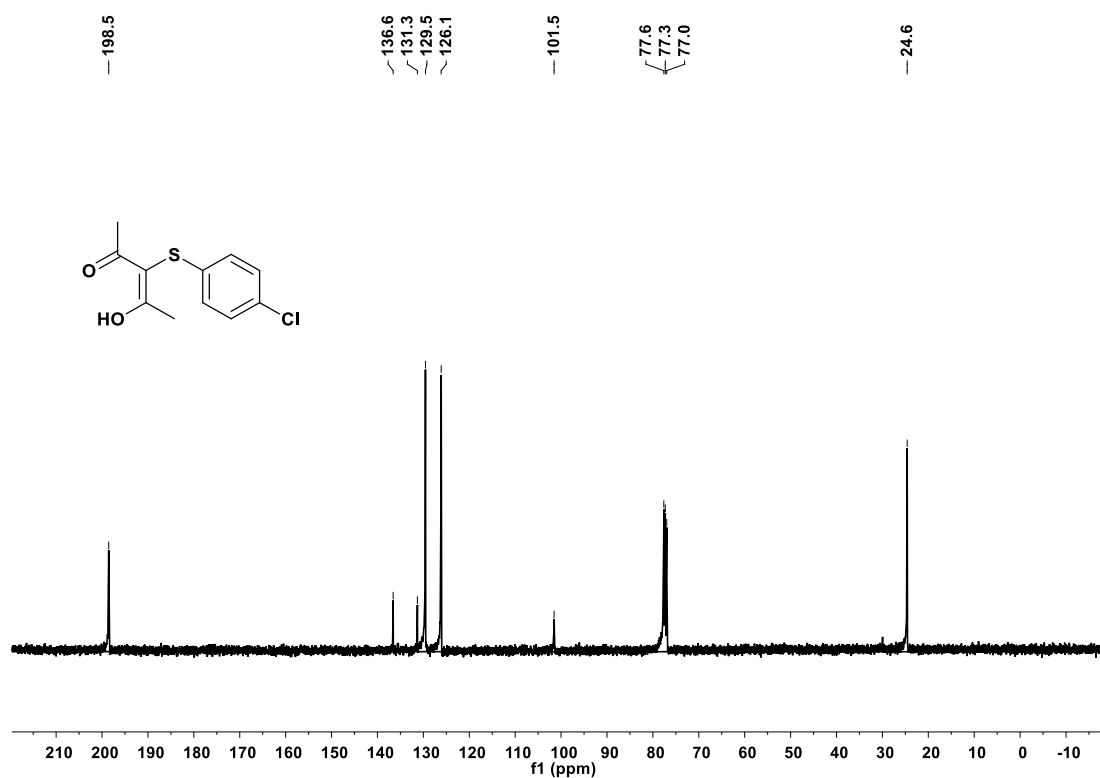



### 3b

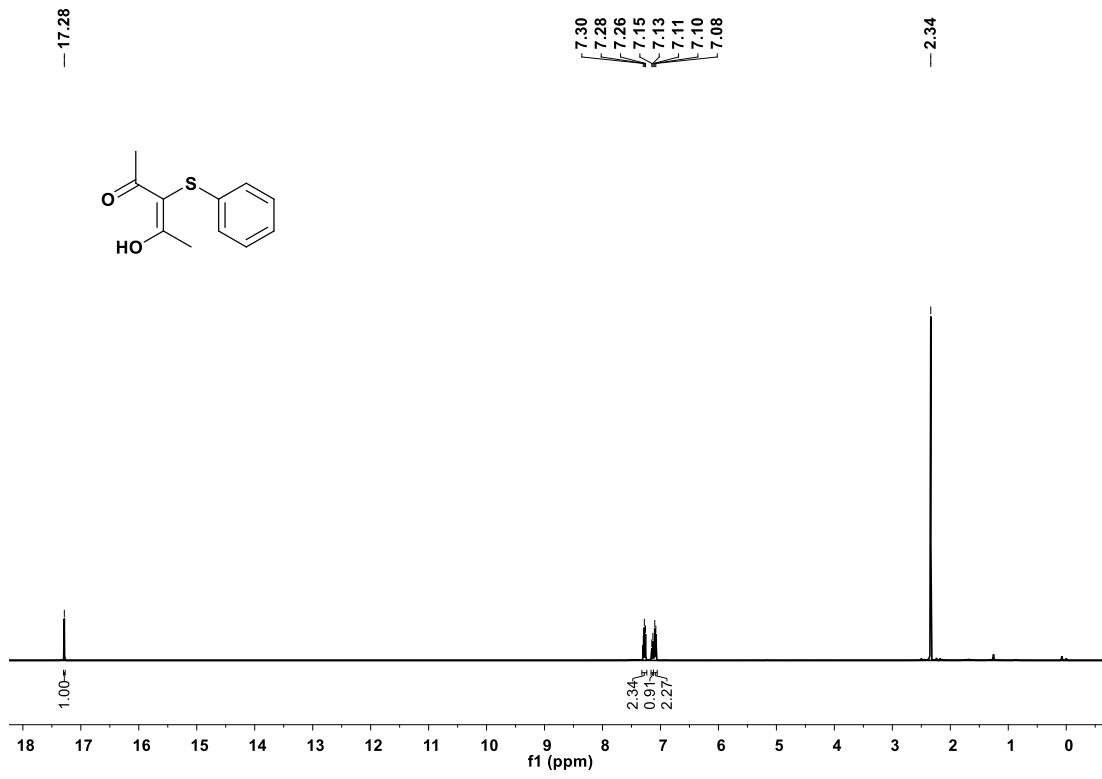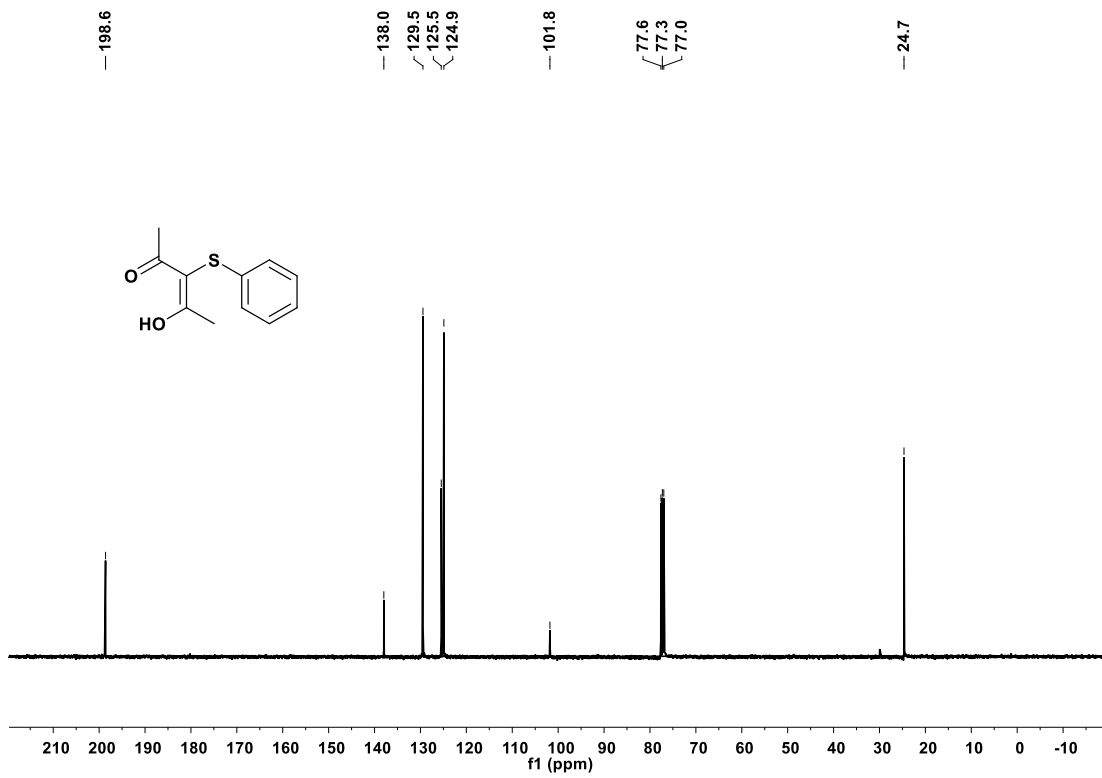

3c

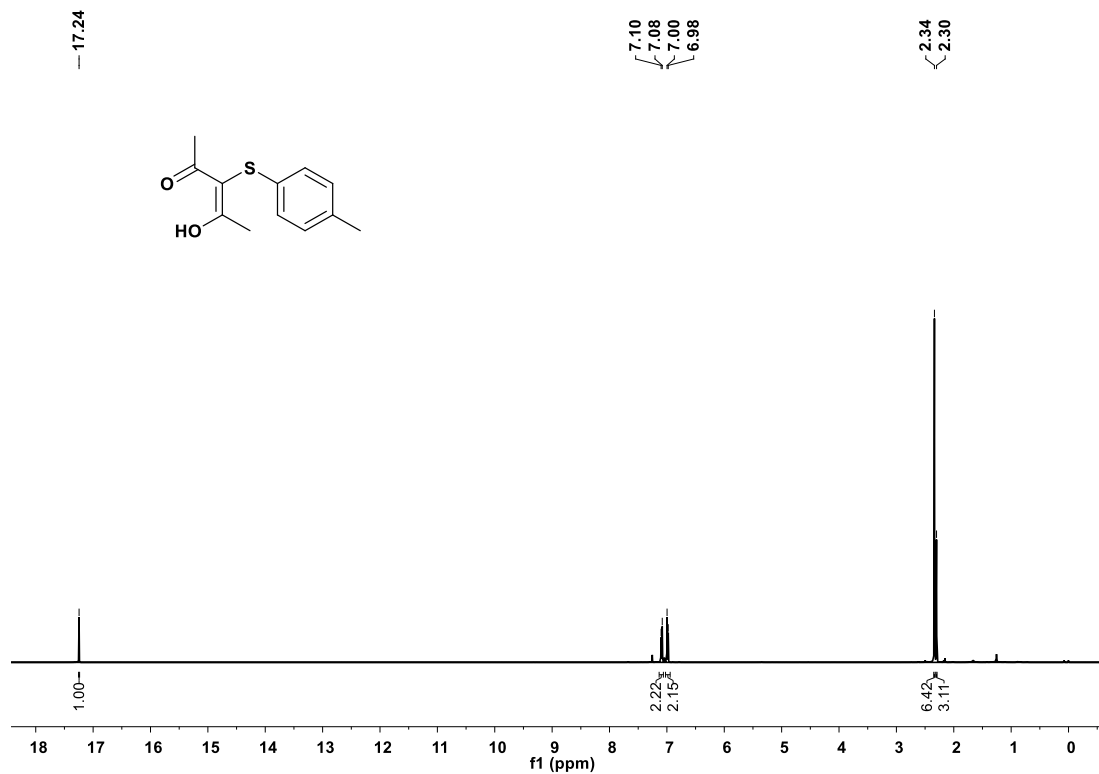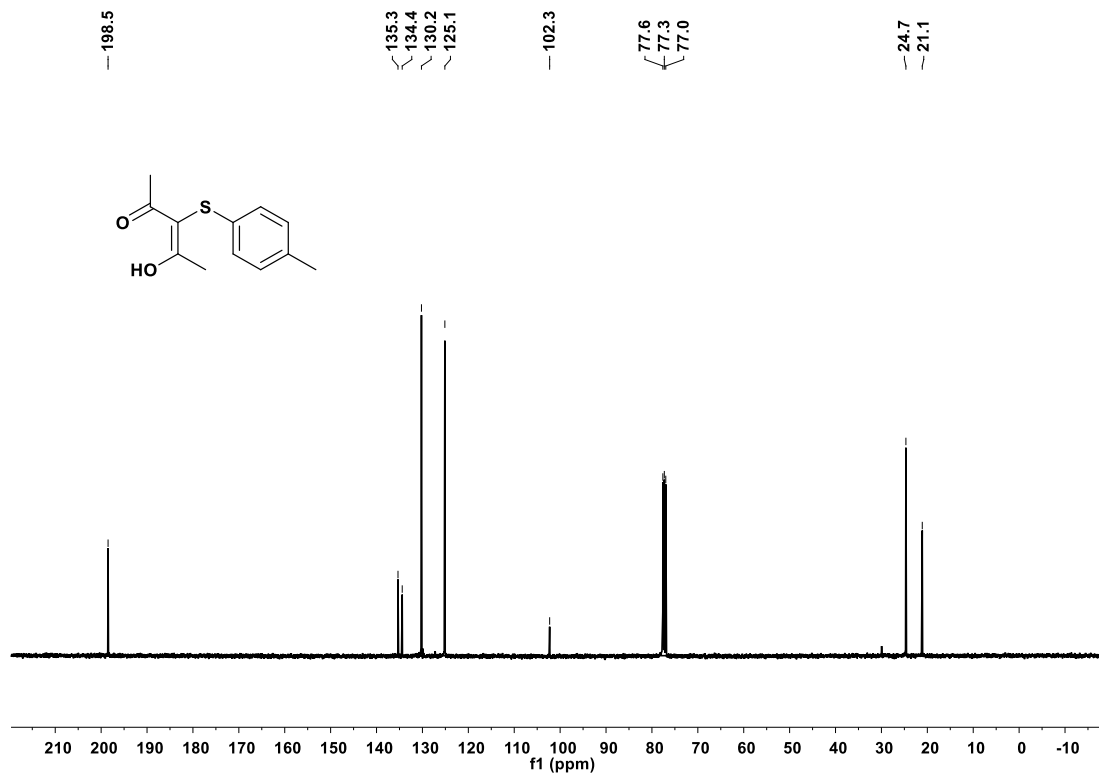

### 3d

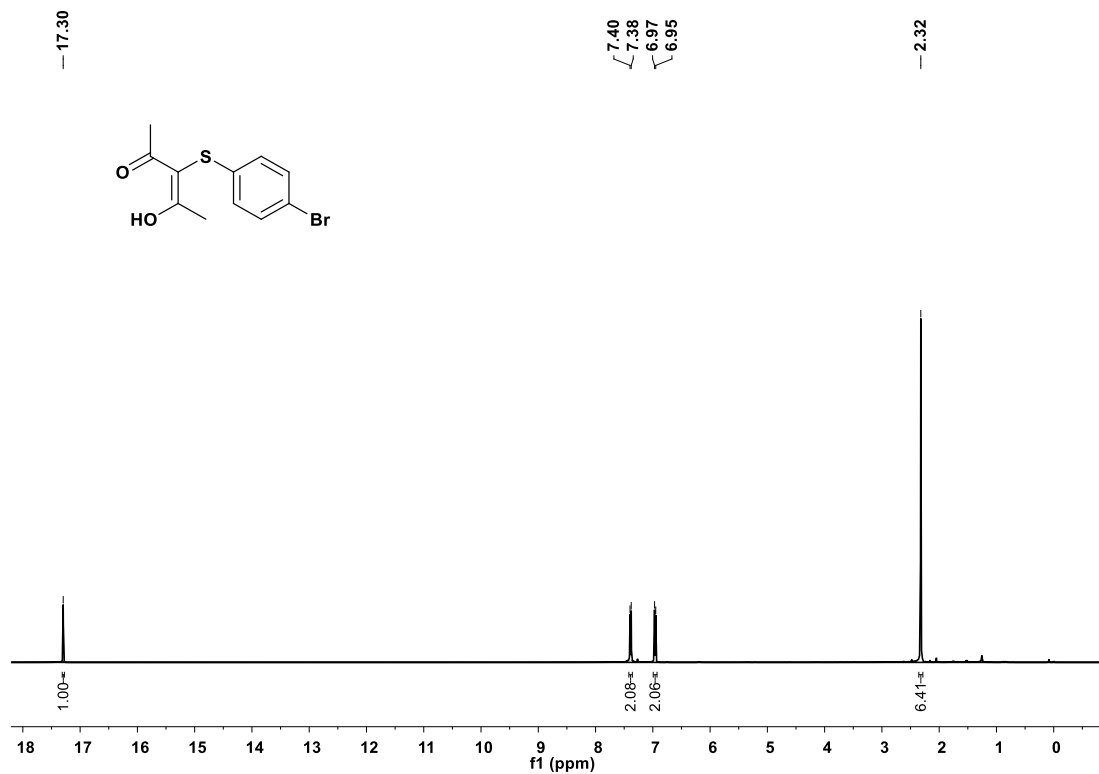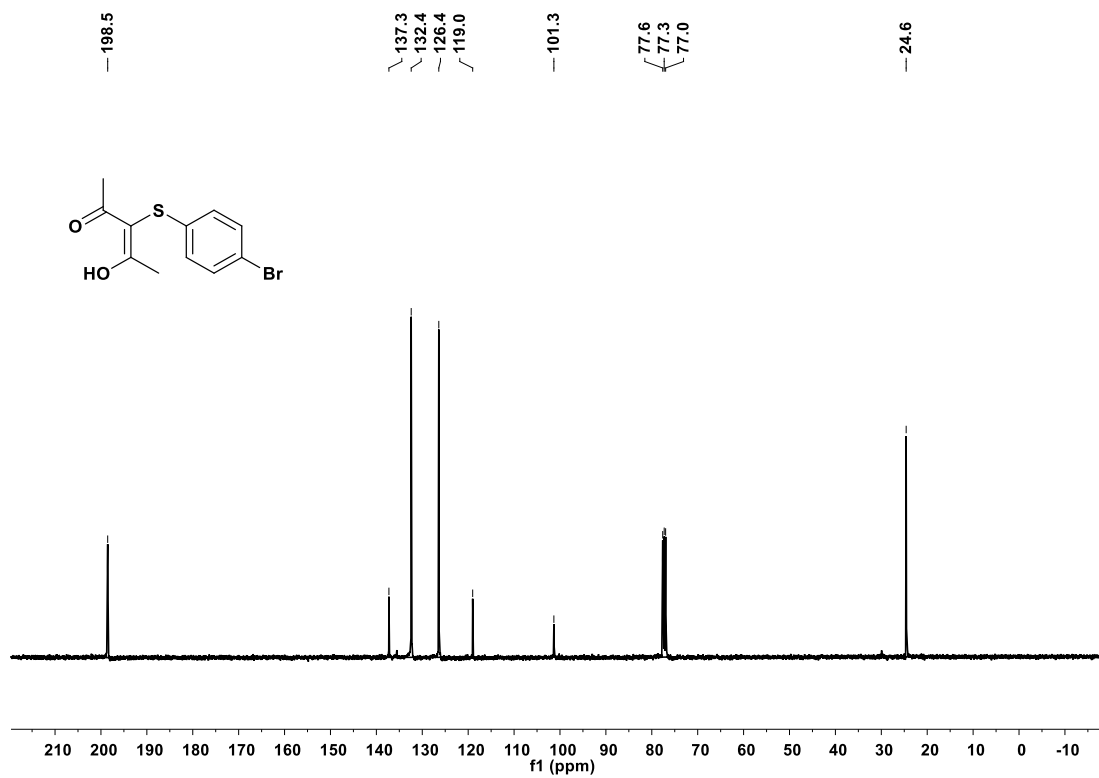

3e

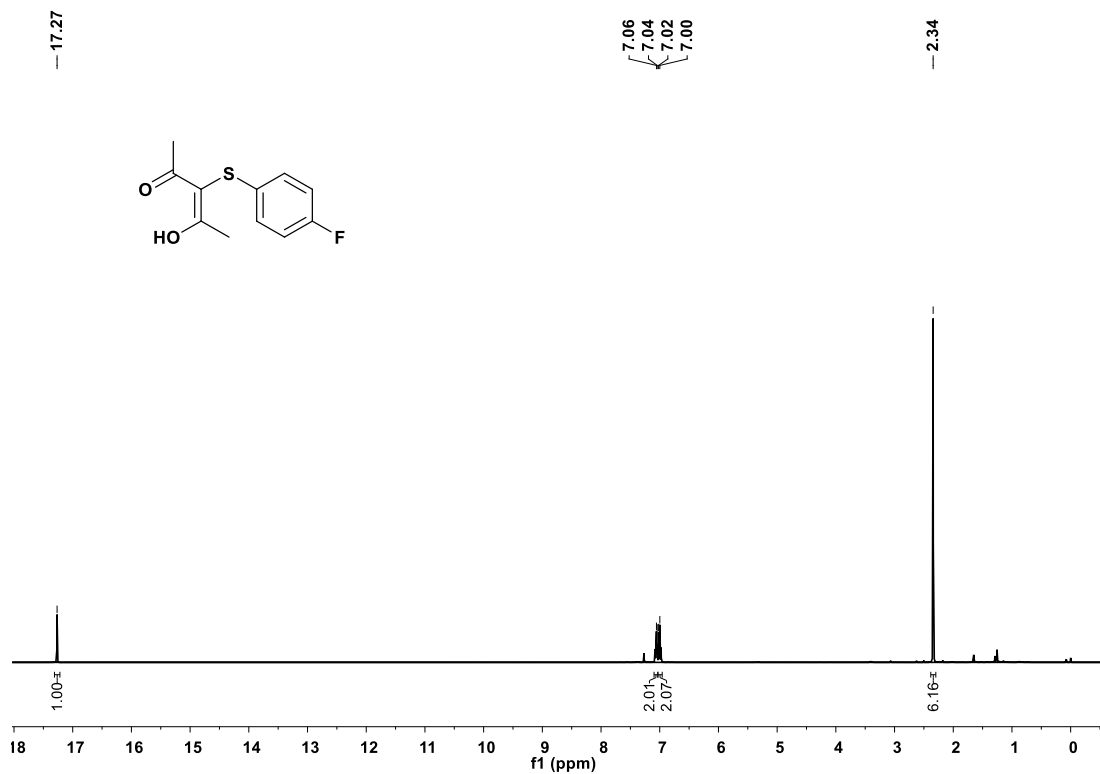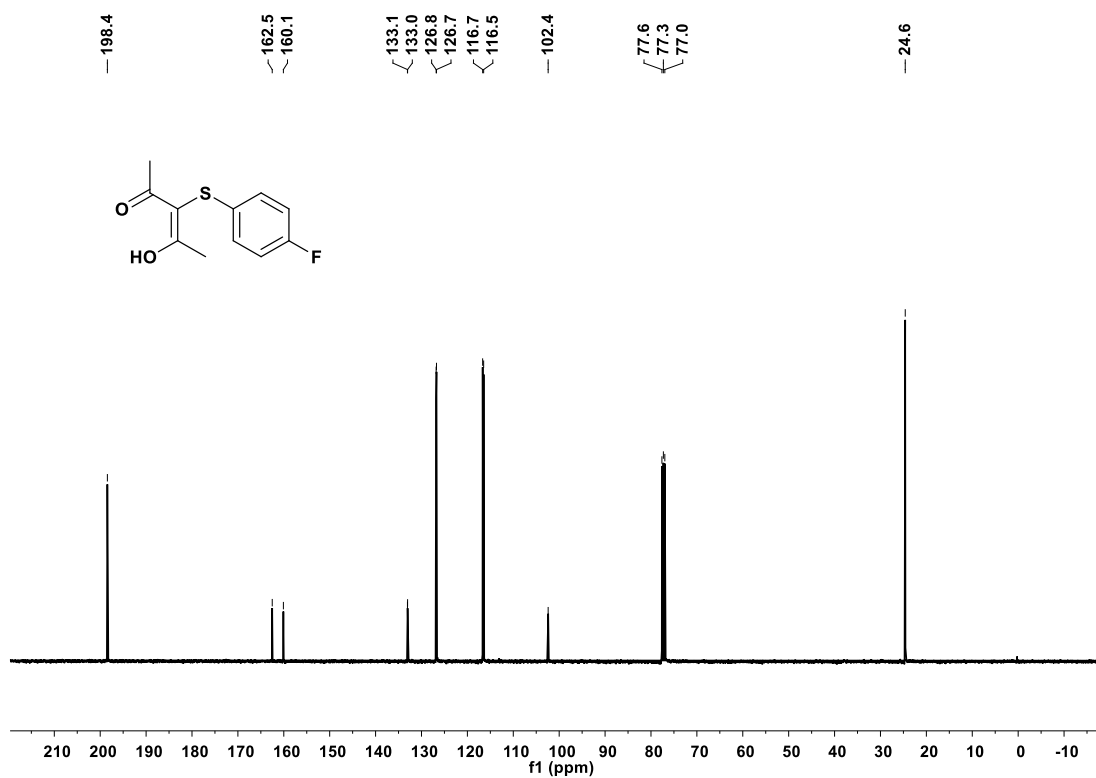

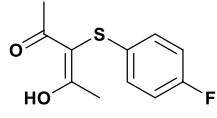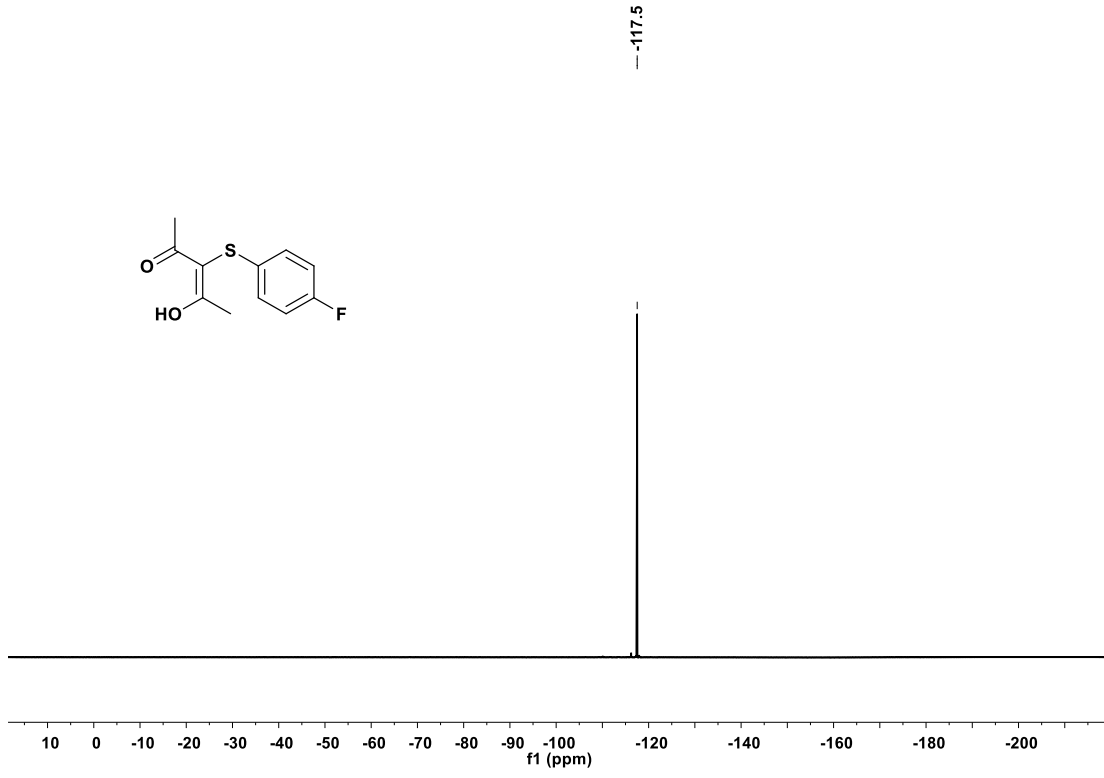

3f

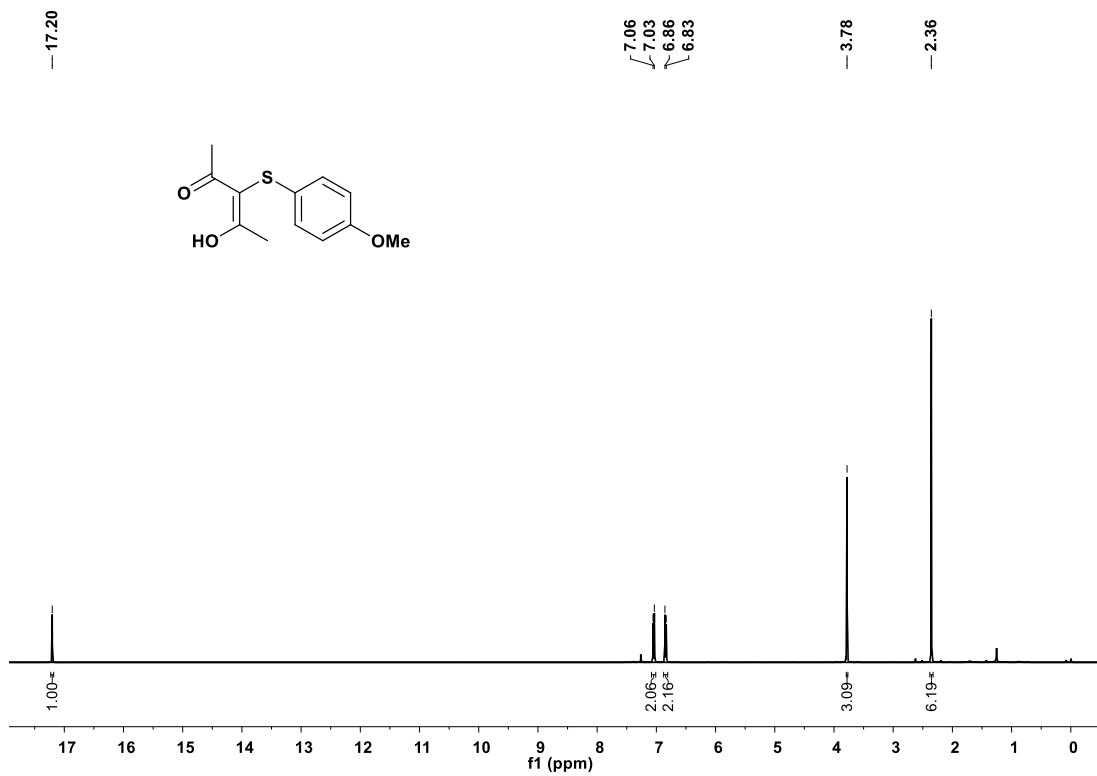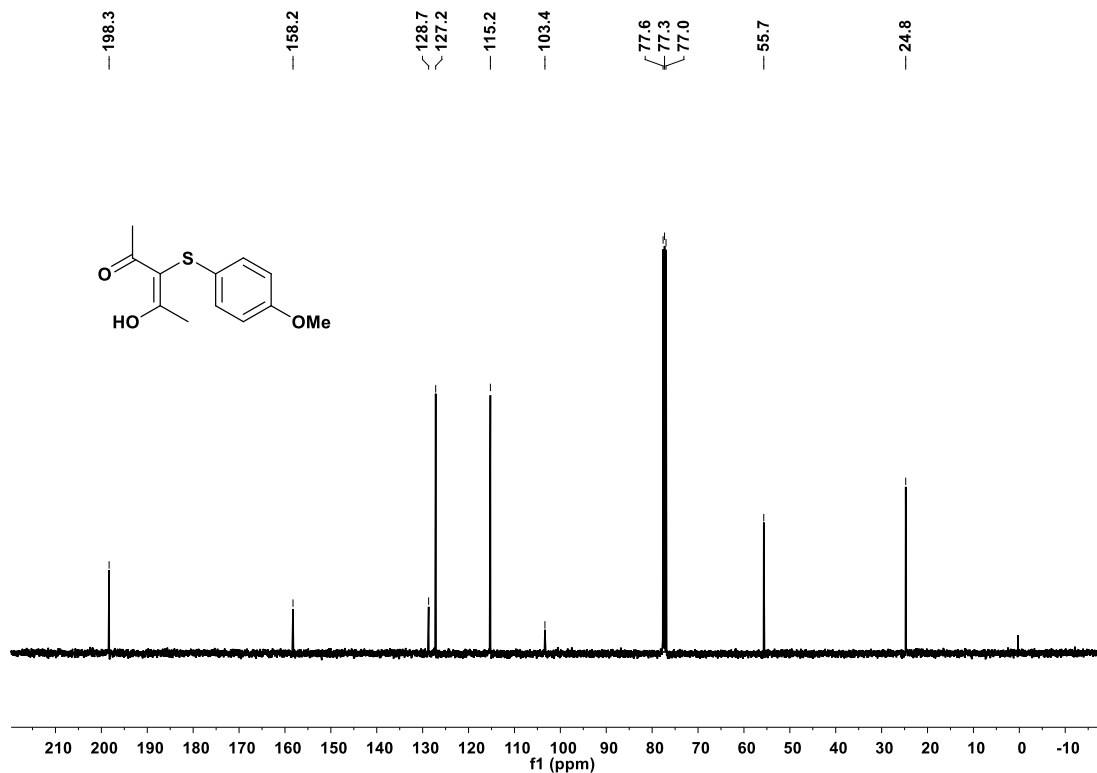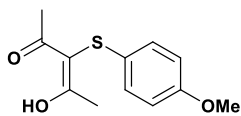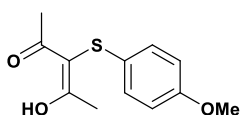

3g

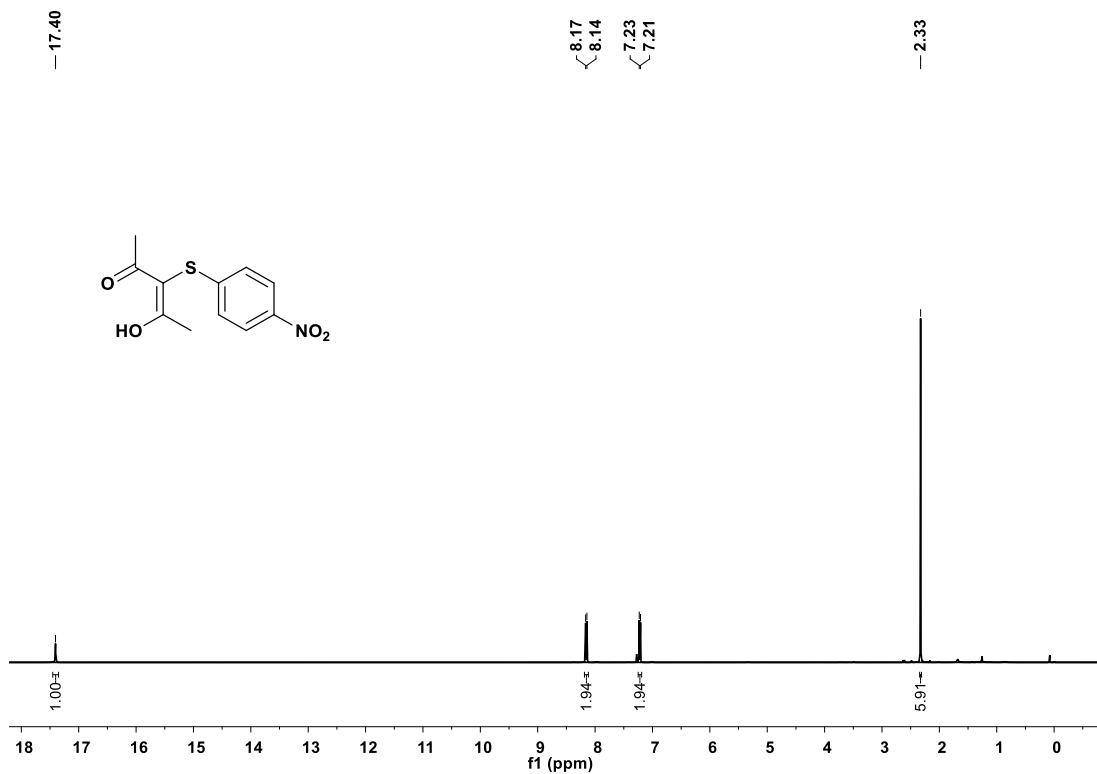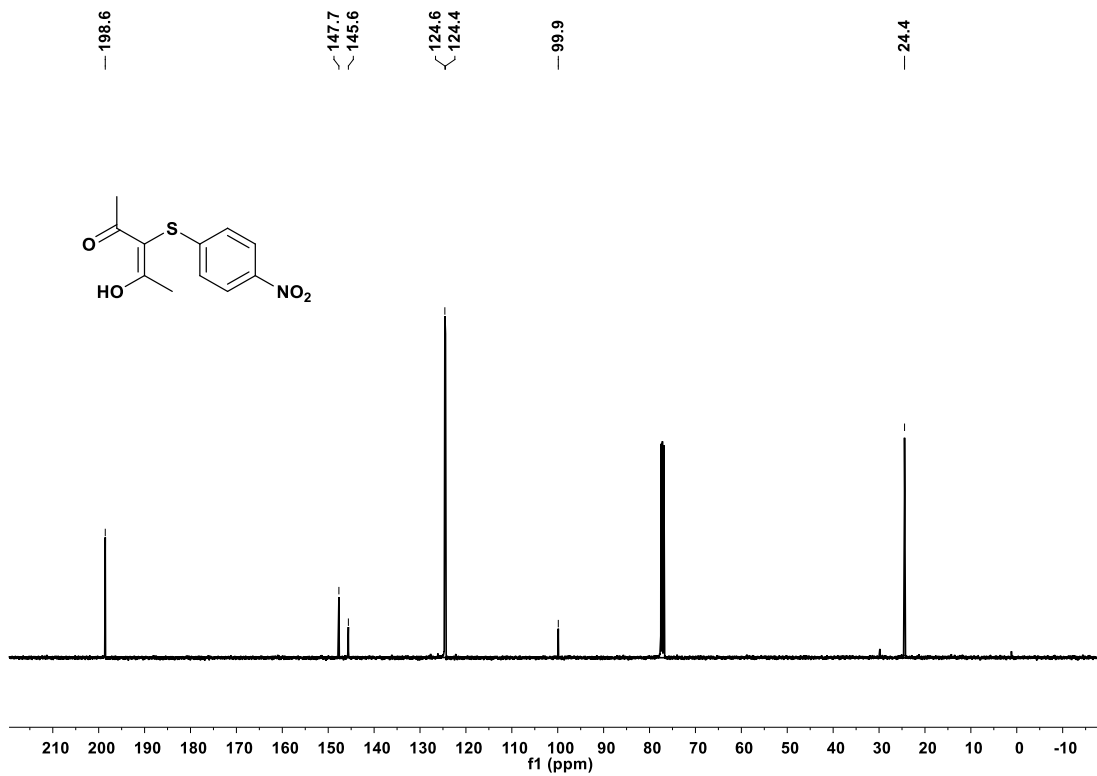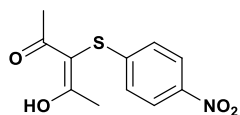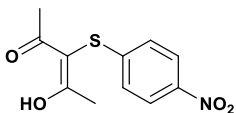

3h

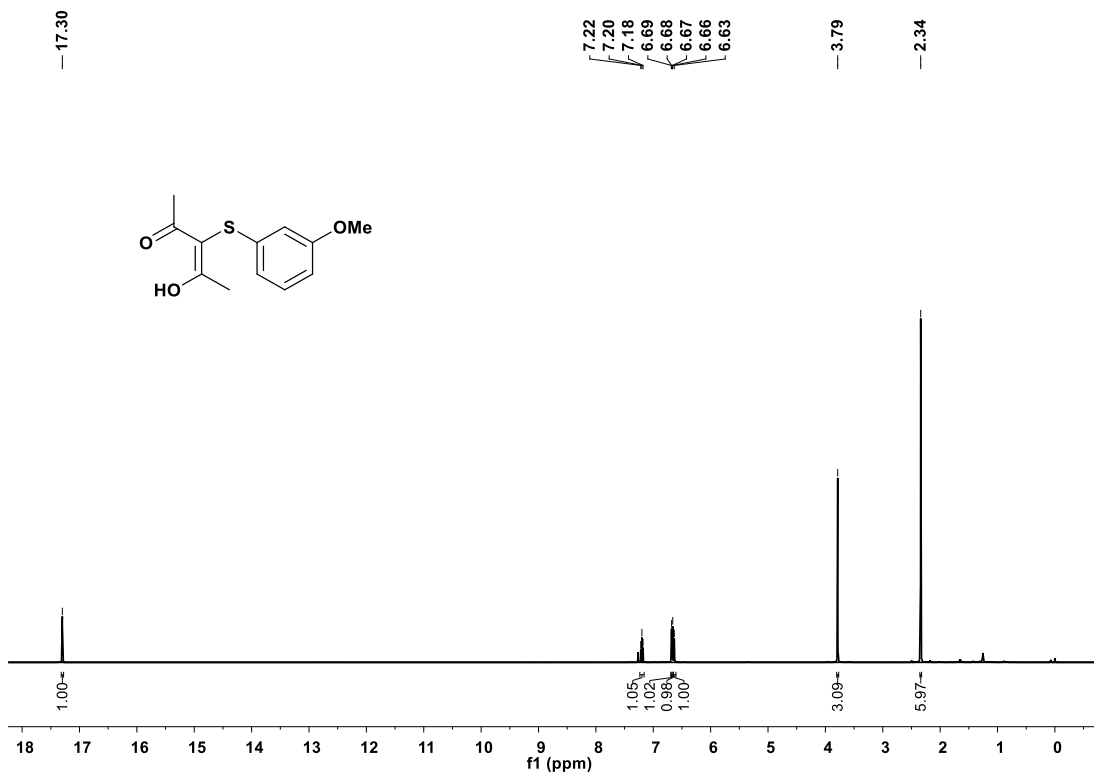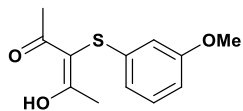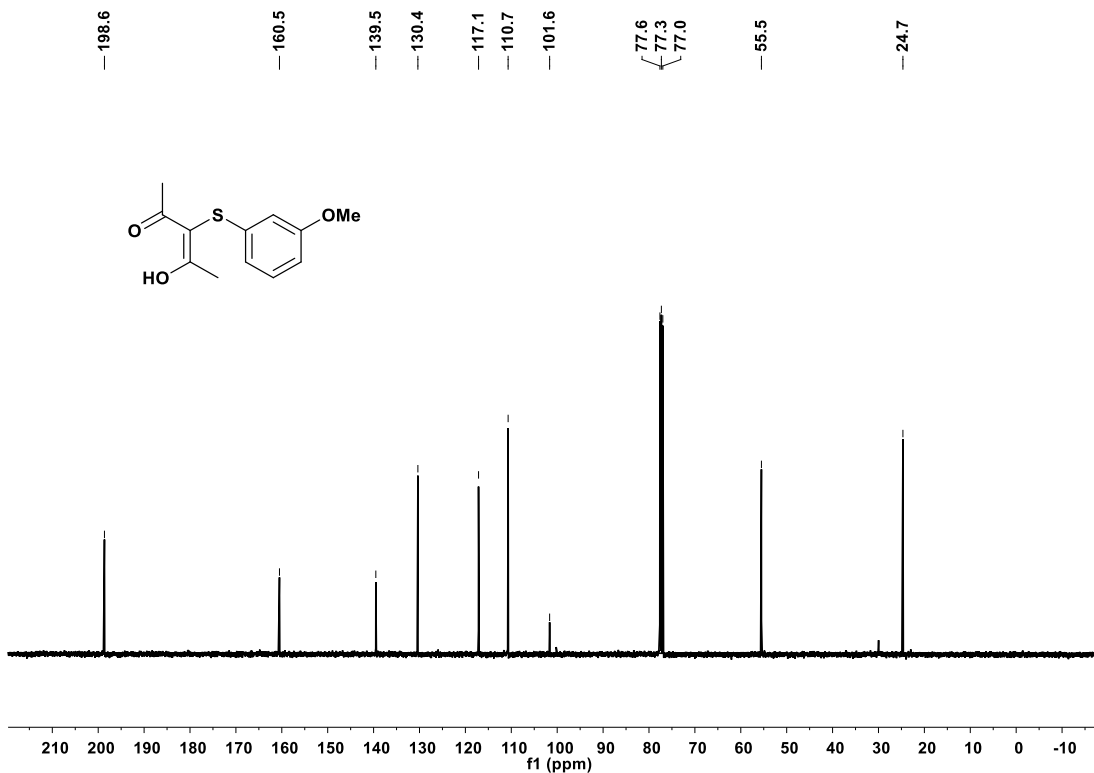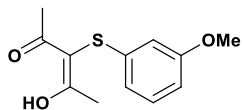



3i

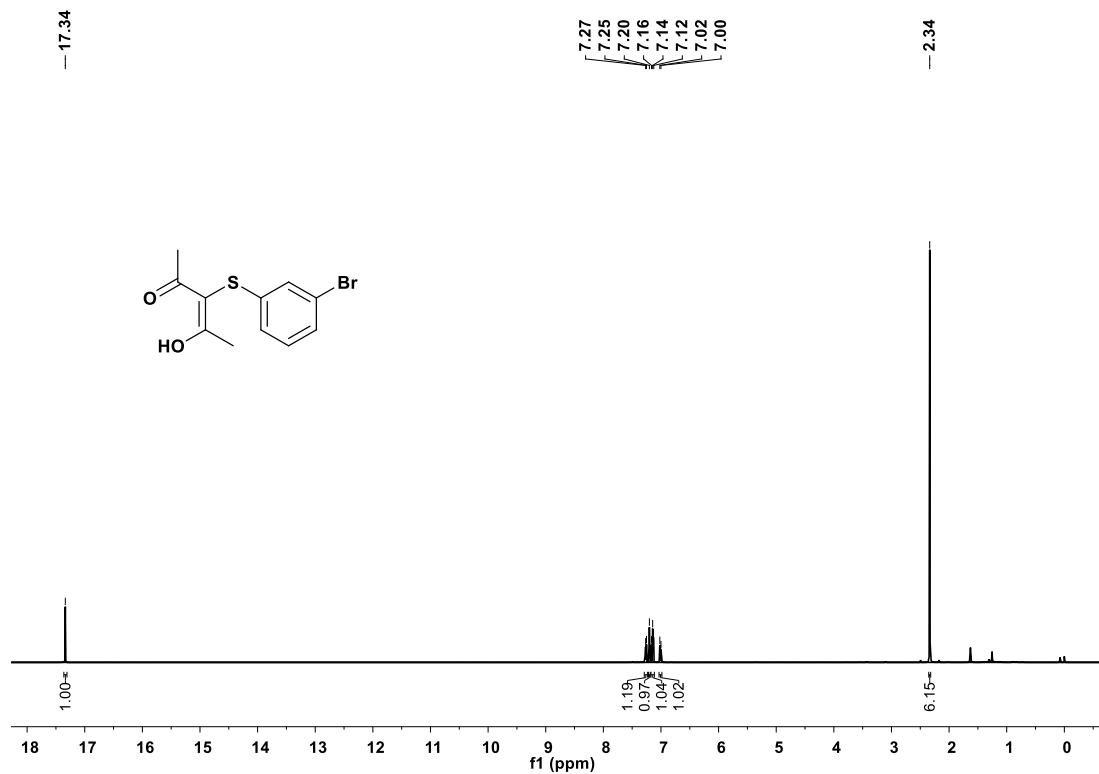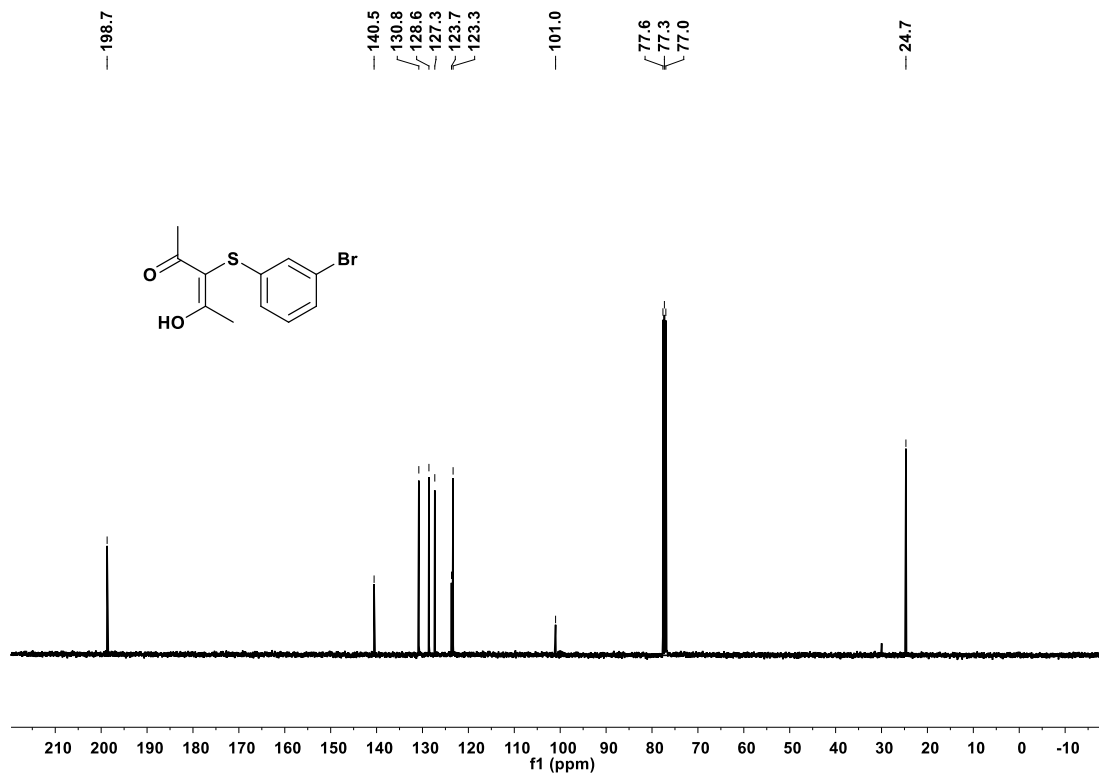

3j

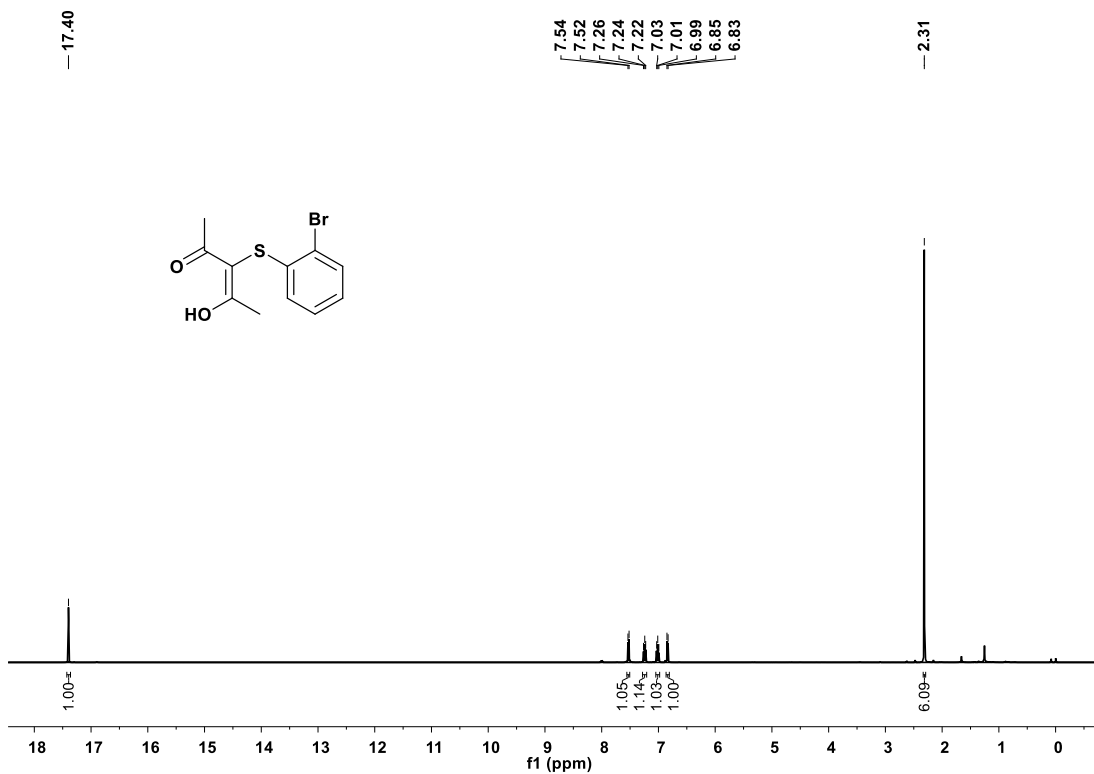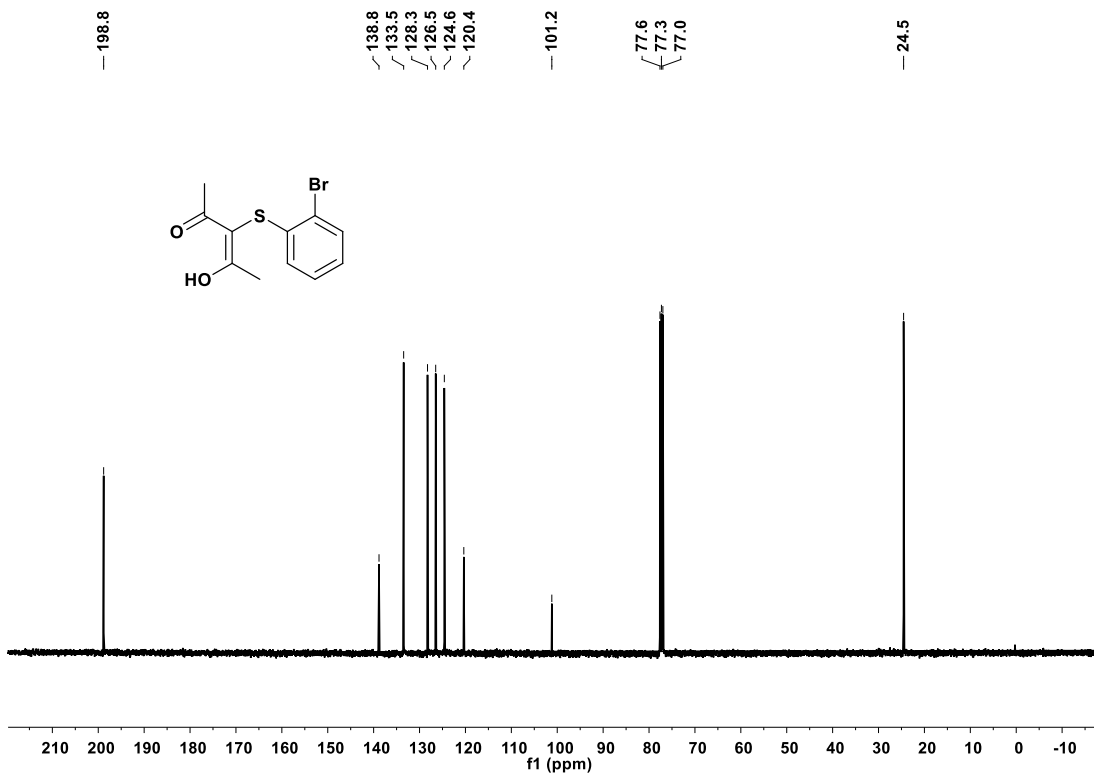

3k

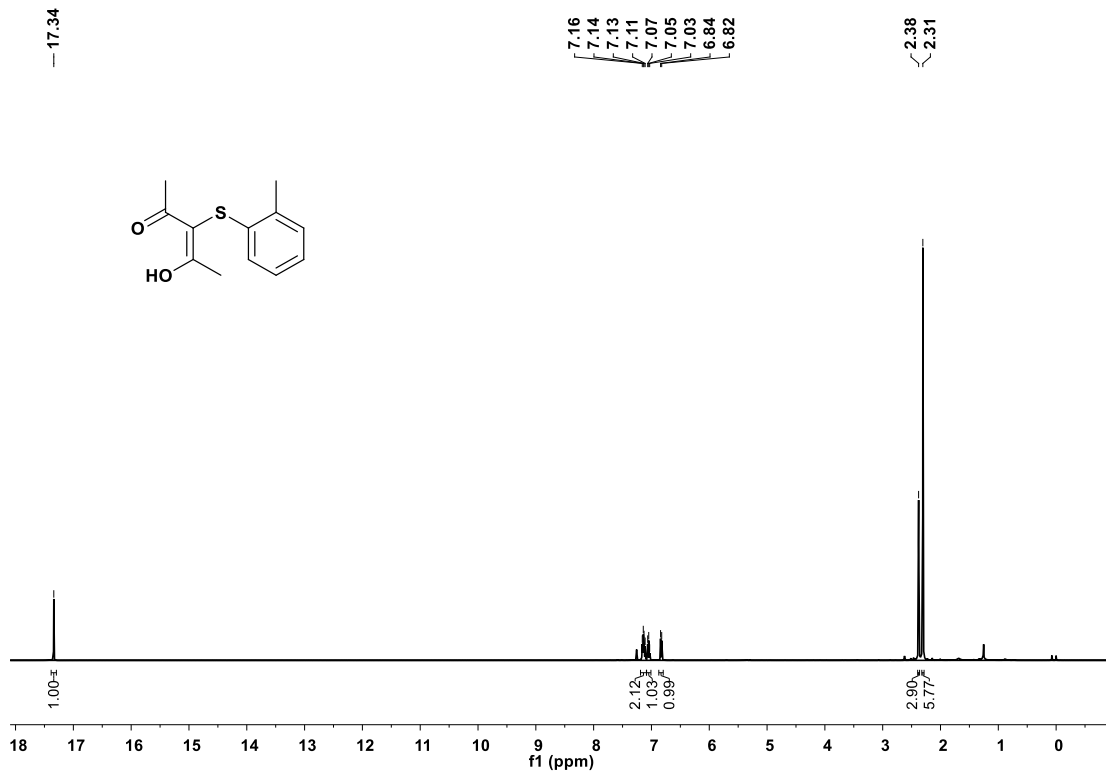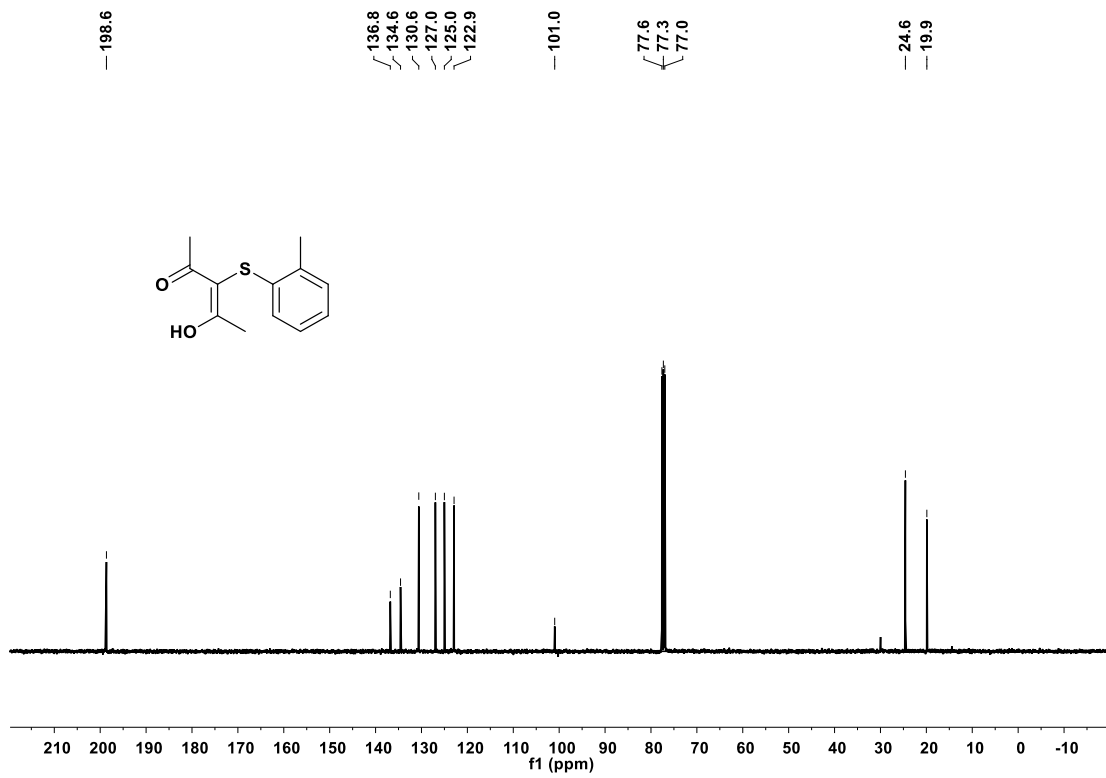

3l

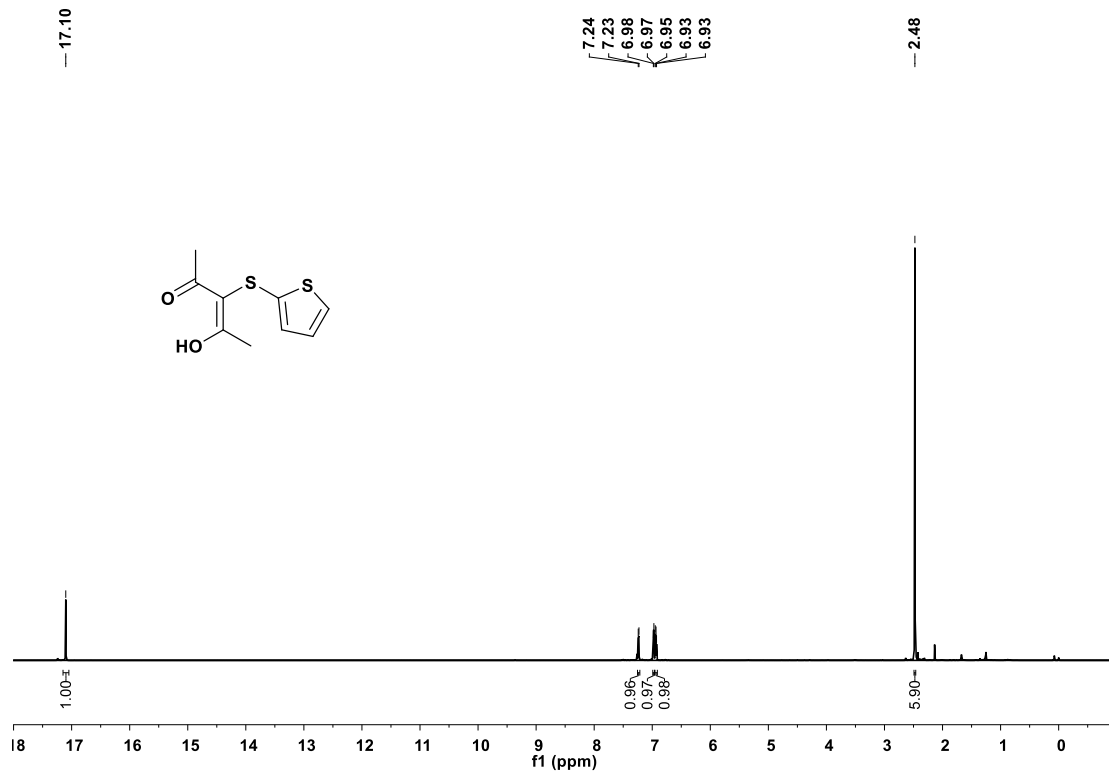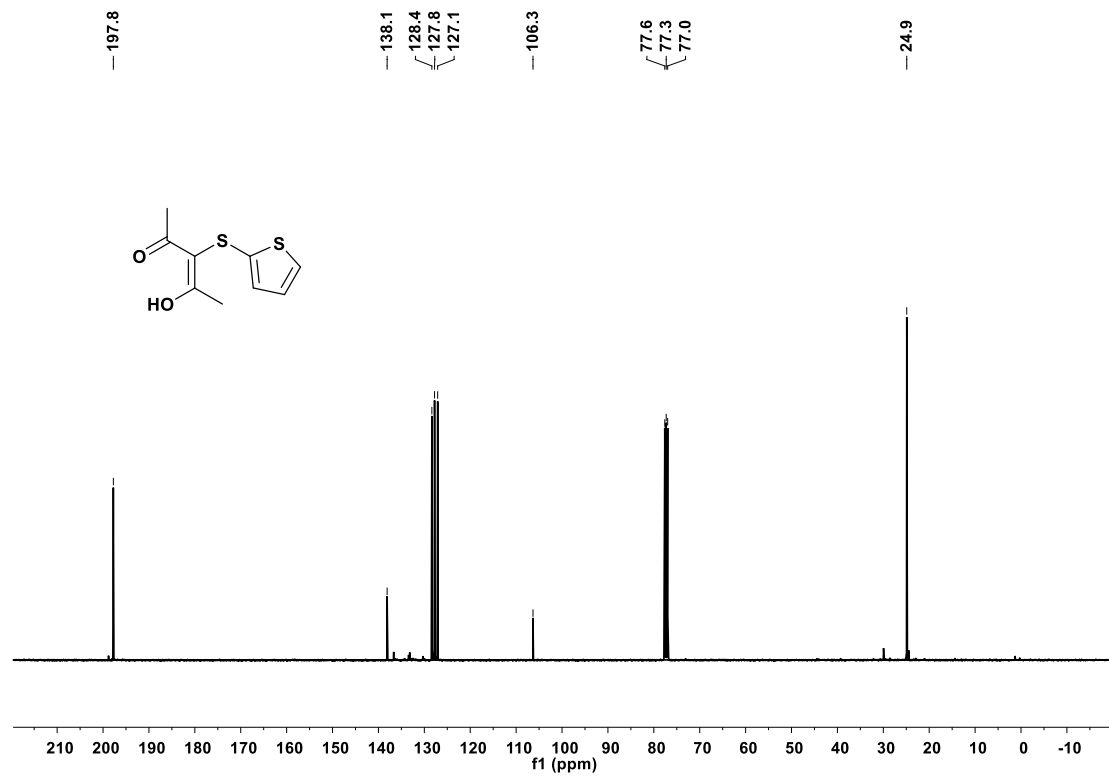

### 3m

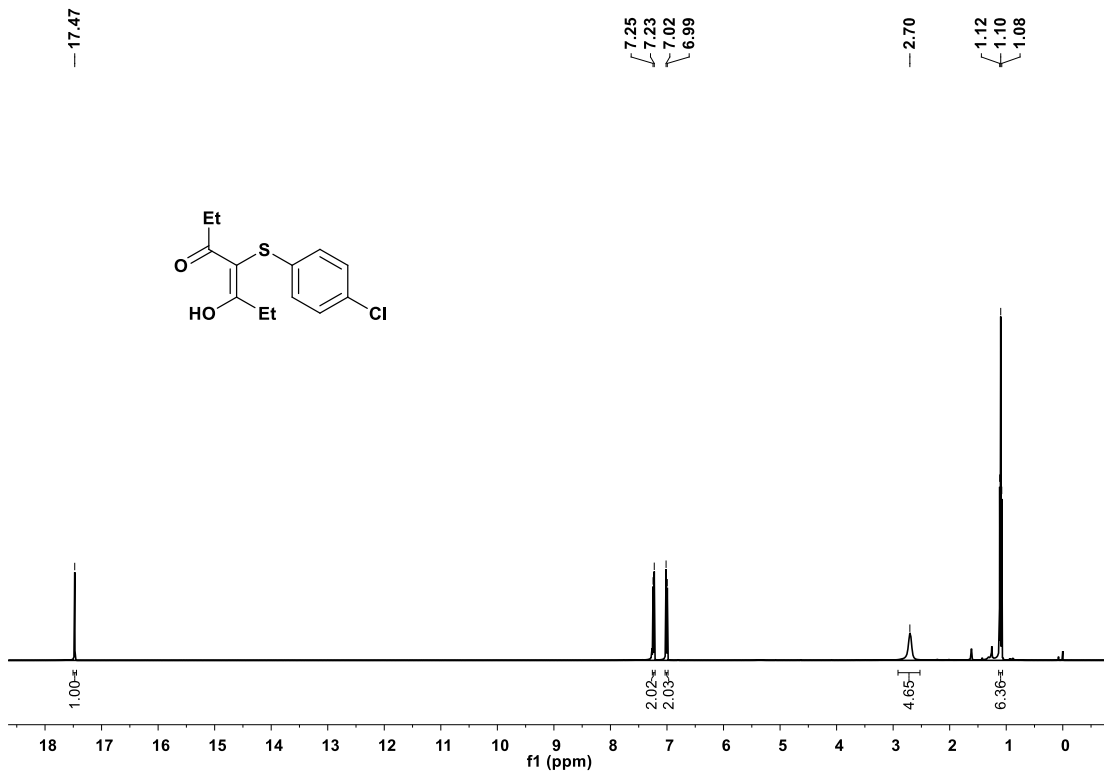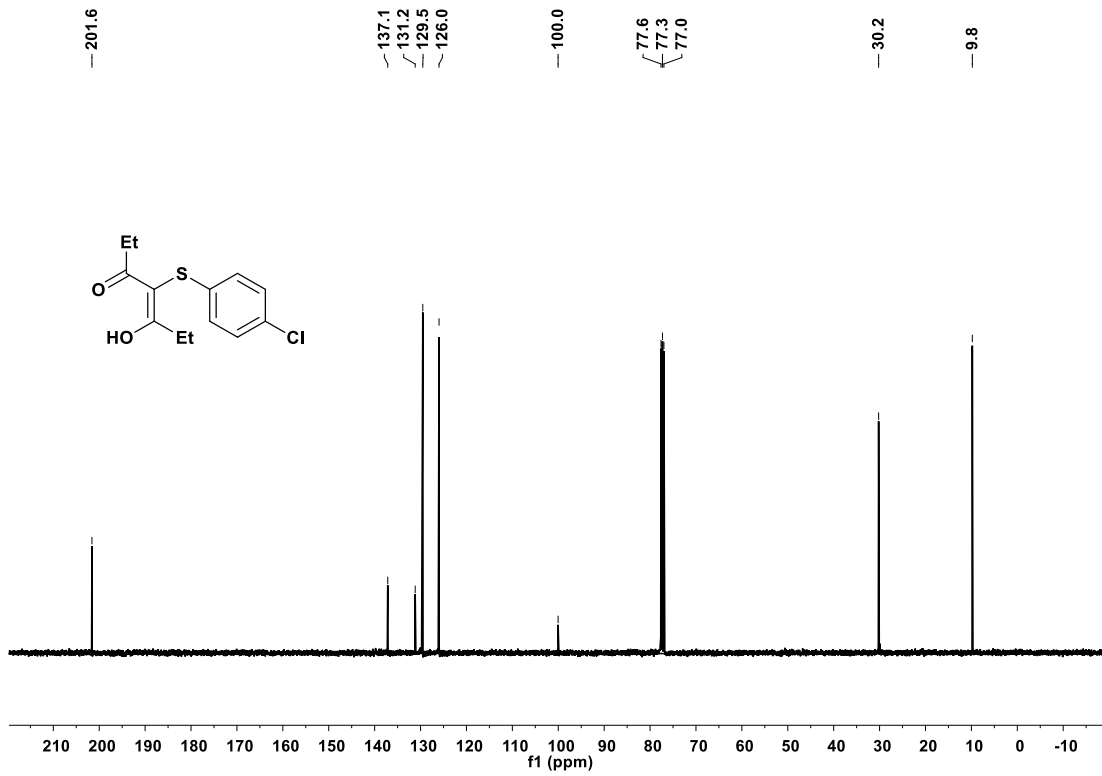

Supplement: c5ra04906g1.pdf [file c5ra04906g1.pdf]
